# Supplementary material for: Synthesis of a bi-functional terminal polyhedral octasilicate-core dendrimer containing carbazole and 1,8-naphthalimide, and its photoluminescence properties, film formability, and glass transition behavior
Source: Royal Society of Chemistry journal article supplement (doi:10.1039/c5ra25982g), 2016-01-01
Supplement: c5ra25982g1.pdf [file c5ra25982g1.pdf]

**Supporting Information**

**Synthesis of a Bi-Functional Terminal Polyhedral  
Octasilicate-Core Dendrimer containing Carbazole and  
1,8-Naphthalimide, and its Photoluminescence  
Properties, Film Formability, and Glass Transition  
Behavior**

Yasuyuki Irie, Takahiro Yamanaka, and Kensuke Naka

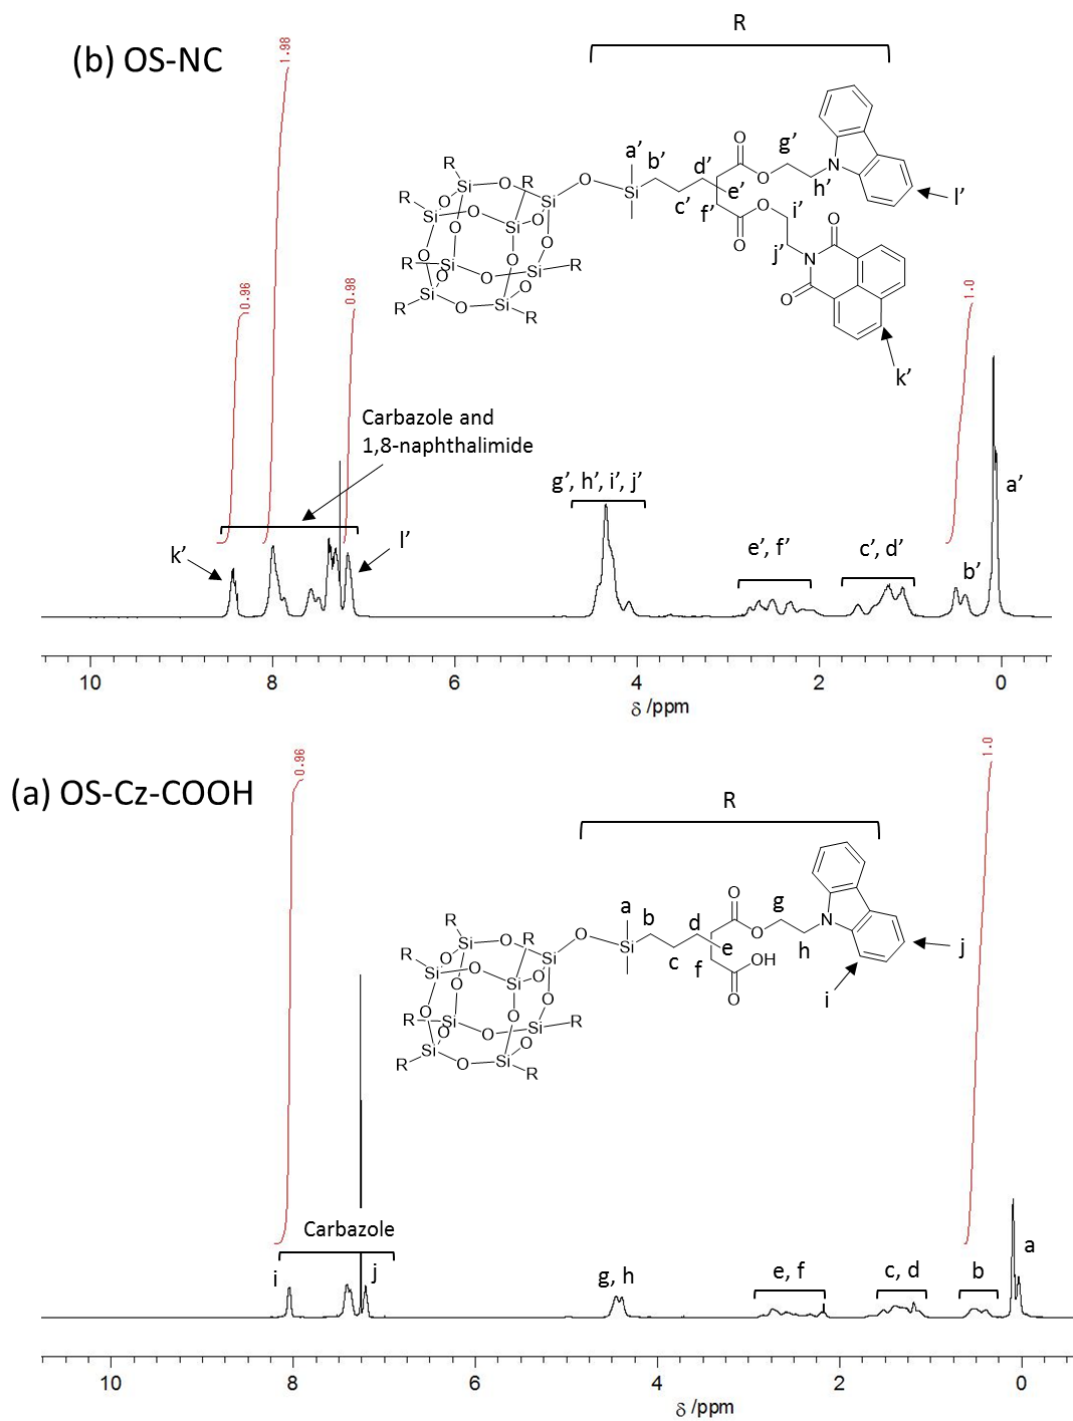

**Fig. S1**  $^1\text{H}$  NMR spectrum (400 MHz) in  $\text{CDCl}_3$ ; (a) OS-Cz-COOH and (b) OS-NC.

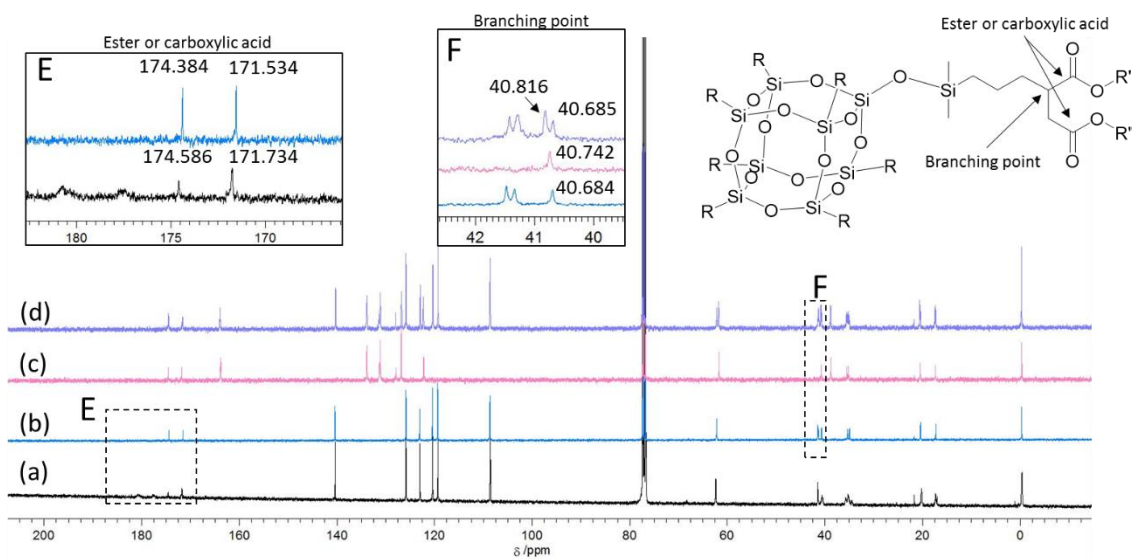

**Fig. S2**  $^{13}\text{C}$  NMR spectrum (100 MHz) in  $\text{CDCl}_3$ ; (a) OS-Cz-COOH, (b) OS-Cz, (c) OS-Ni, and (d) OS-NC.

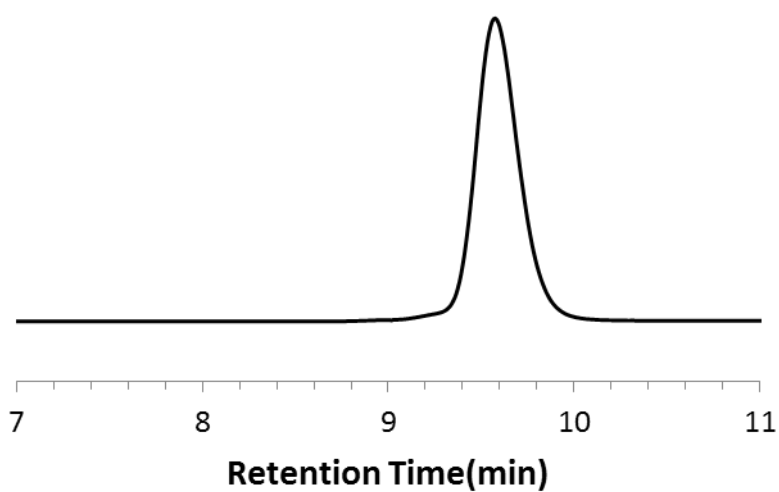

**Fig. S3** GPC analysis of OS-NC in DMF containing with 10 mM LiBr.

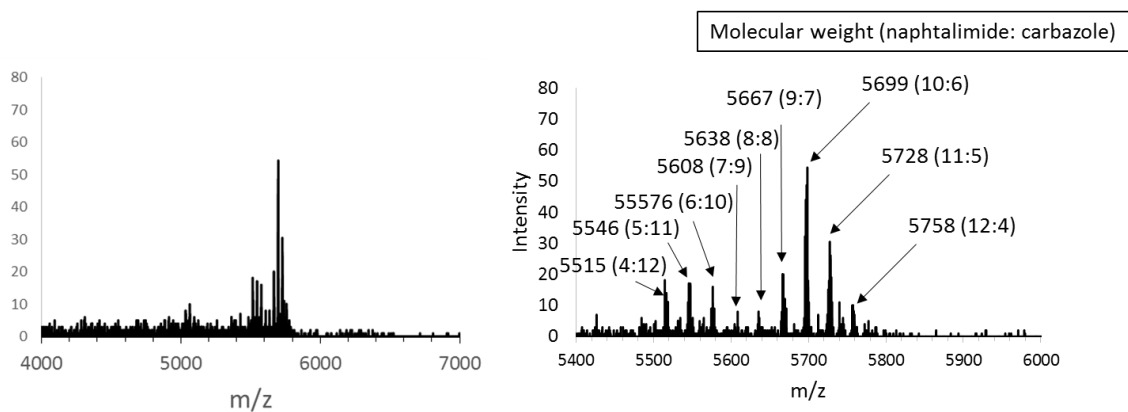

**Fig. S4** (left) MALDI TOF-MS spectra of OS-NC, and (right) expanded spectra.

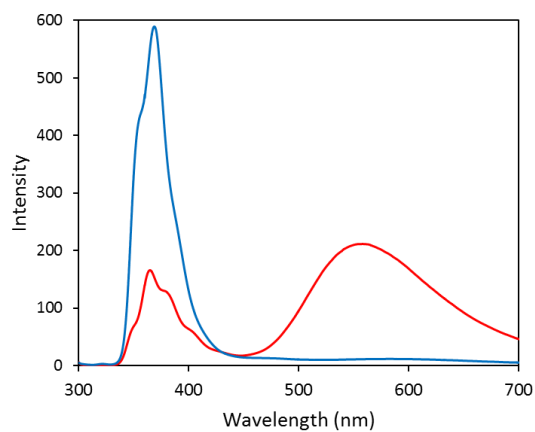

**Fig. S5** PL spectra of OS-NC in (red)  $\text{CHCl}_3$ , and (blue) DMSO.

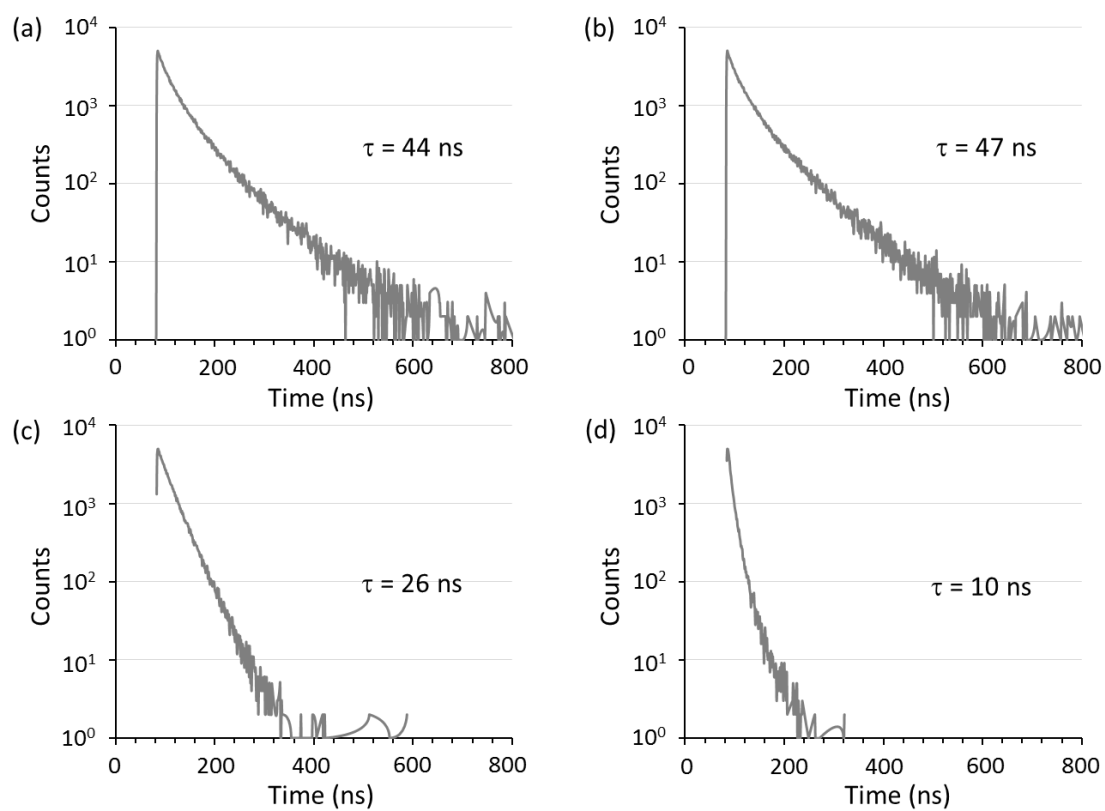

**Fig. S6** The emission decay kinetics of (a) OS-NC, (b) OS-C<sub>0.5</sub>N<sub>0.5</sub>, (c) OS-Cz, and (d) OS-Ni on excitation at 380 nm.
